# Supplementary material
Source: publisher figshare collection journal article supplement (https://acs.figshare.com/ndownloader/files/32821715)
Supplement: Supplementary file 1 [file 32821715]

# Design of One-dimensional Cadmium Sulfide/Polydopamine Hetero-nanotube Photocatalysts for Ultrafast Degradation of Antibiotics

*Jingyu Lu, Chuanjie Fang, Guitu Wang, and Liping Zhu\**

MOE Key Laboratory of Macromolecular Synthesis and Functionalization, Department of  
Polymer Science and Engineering, Zhejiang University, Hangzhou 310027, PR. China.

\* Corresponding Author

E-mail: [lpzhu@zju.edu.cn](mailto:lpzhu@zju.edu.cn)

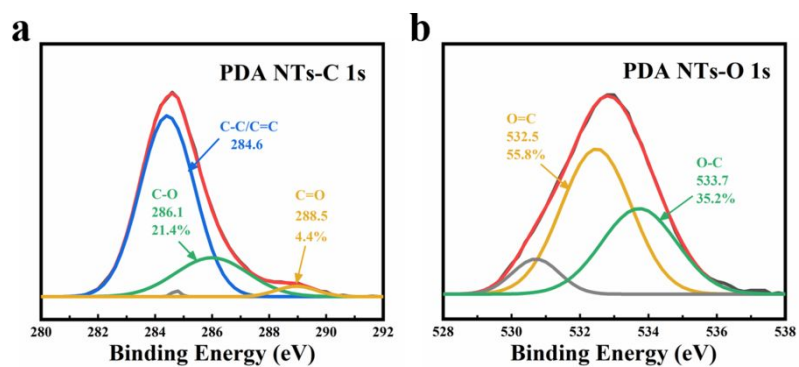

**Figure S1.** The XPS high-resolution spectra of (a) C1s and (b) O1s in PDA NTs.

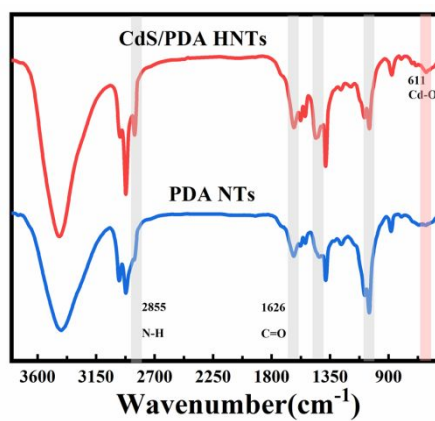

**Figure S2.** The FT-IR curves of CdS/PDA HNTs and PDA NTs.

| P/Po                               | Volume<br>[cc/g] STP | 1 / (W ((Po/P) - 1)) |
|------------------------------------|----------------------|----------------------|
| 3.1387e-02                         | 0.0241               | 1.075E+03            |
| 3.6486e-02                         | 0.0252               | 1.204E+03            |
| 4.1460e-02                         | 0.0254               | 1.362E+03            |
| Area = 1.214E-01 m²g               |                      |                      |
| Slope = 2.852E+04                  |                      |                      |
| Y - Intercept = 1.741E+02          |                      |                      |
| Correlation Coefficient = 0.997931 |                      |                      |
| C = 1.648E+02                      |                      |                      |

**Figure S3.** BET results of CdS.

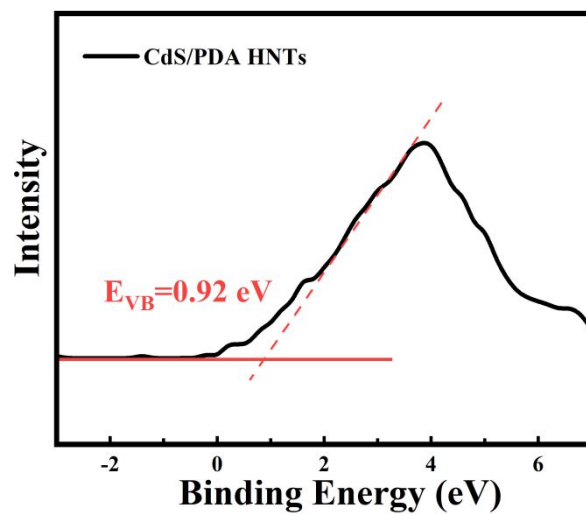

**Figure S4.** XPS valence band spectra of CdS/PDA HNTs nanostructure.

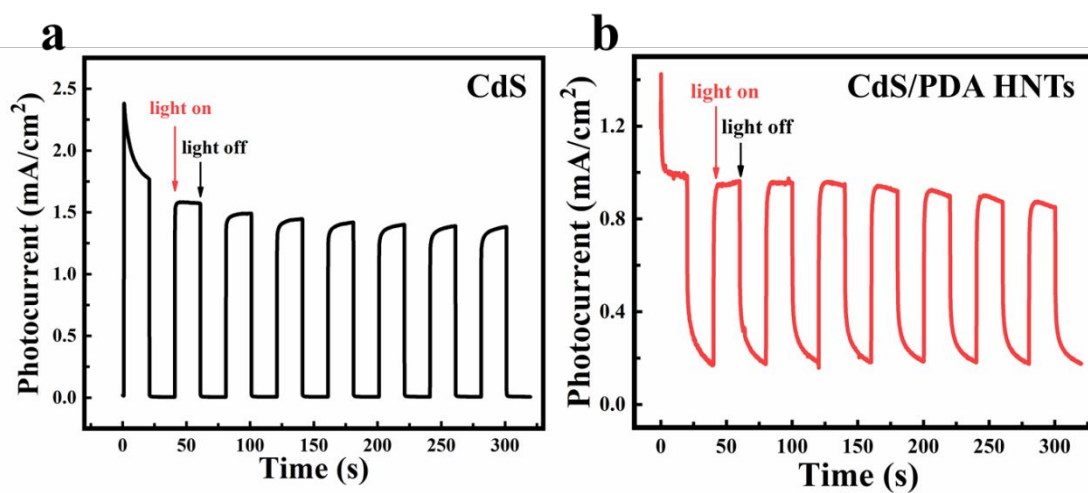

**Figure S5.** Photocurrent-time curves of (a) CdS and (b) CdS/PDA HNTs.

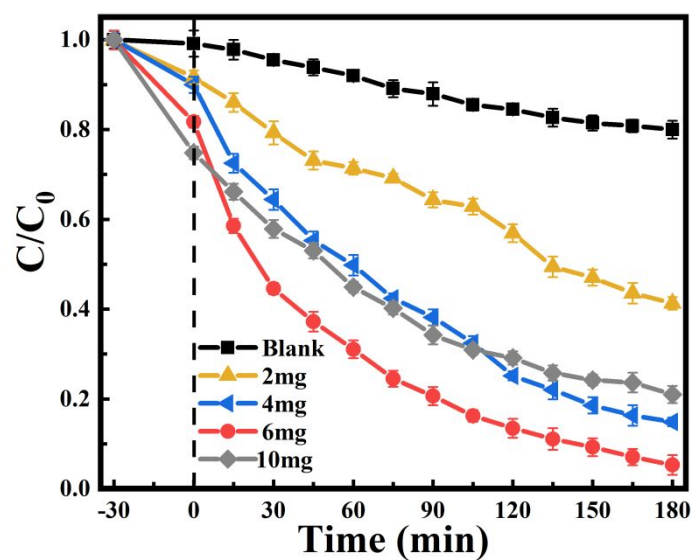

**Figure S6.** The catalytic degradation of TC with 0,2,4,6, and10 mg of CdS/PDA HNTs.

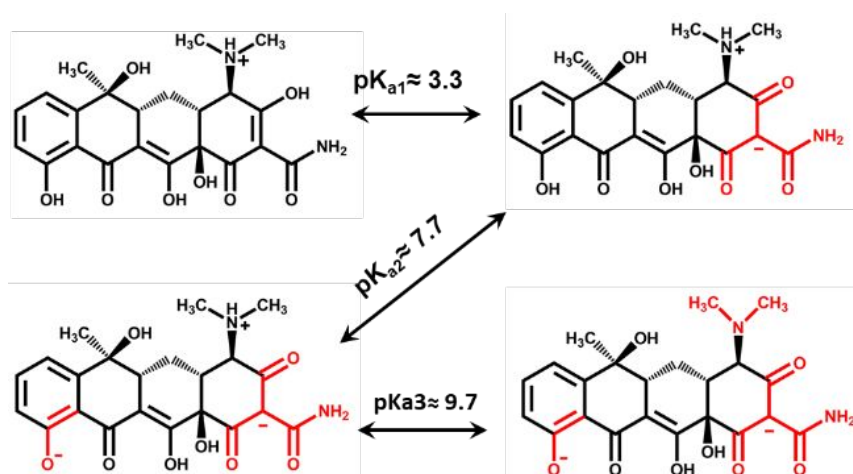

**Figure S7.** The molecular structure of TC under different pH.

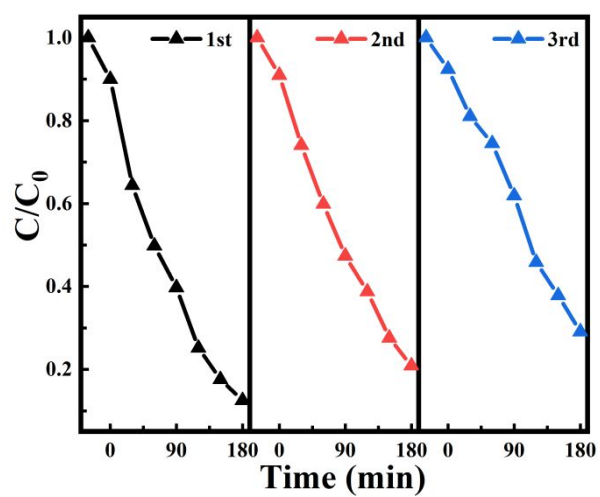

**Figure S8.** Reusability of CdS/PDA HNTs for catalytic degradation of TC.

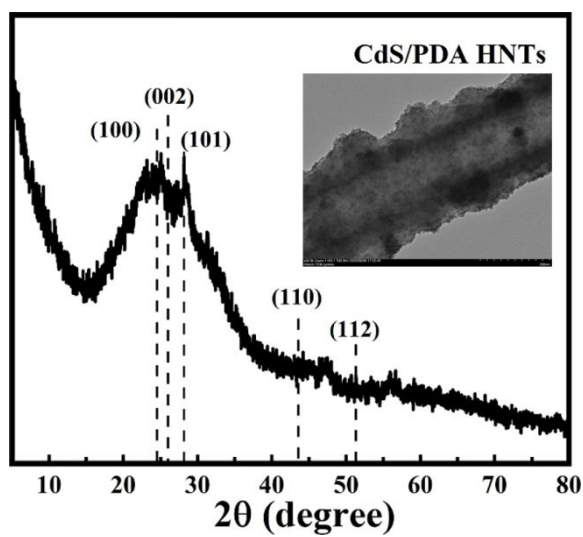

**Figure S9.** XRD patterns and TEM image of the CdS/PDA HNTs after three-time reactions.

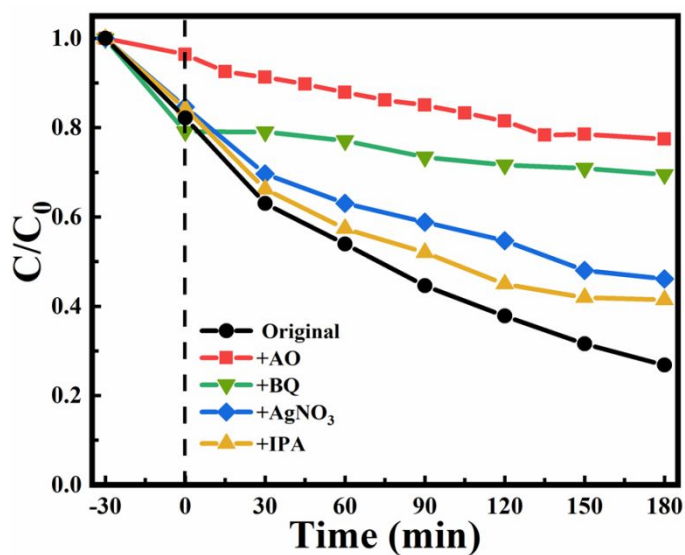

**Figure S10.** Photodegradation of TC by CdS/PDA HNTs with IPA, AO, BQ, and AgNO<sub>3</sub> as active species scavengers. The four specific trapping agents (AgNO<sub>3</sub>, IPA, BQ, and AO) contribute directional inactivate electrons (e<sup>-</sup>), •OH, •O<sub>2</sub><sup>-</sup> and active holes (h<sup>+</sup>), respectively.

**Table S1.** The mass-to-charge ratio (m/z) and retention time of the TC degradation intermediates obtained through HPLC-MS, and the purposed chemical structures.

| Number | Retention Time/min | m/z | Support Structure |
|--------|--------------------|-----|-------------------|
| TC     | 7.320              | 445 |                   |

|    |        |     |                                                                                       |
|----|--------|-----|---------------------------------------------------------------------------------------|
| 1  | 8.390  | 461 | 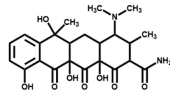   |
| 2  | 11.035 | 457 |    |
| 3  | 8.439  | 439 |    |
| 4  | 19.539 | 434 |    |
| 5  | 12.713 | 400 |    |
| 6  | 9.164  | 394 |  |
| 7  | 22.066 | 385 |  |
| 8  | 17.447 | 384 |  |
| 9  | 19.110 | 365 |  |
| 10 | 19.110 | 337 |  |
| 11 | 19.110 | 337 |  |

|    |        |     |                                                                                       |
|----|--------|-----|---------------------------------------------------------------------------------------|
| 12 | 12.779 | 321 | 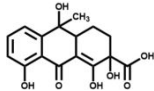   |
| 13 | 17.118 | 296 |    |
| 14 | 16.507 | 250 |    |
| 15 | 1.161  | 224 |    |
| 16 | 1.202  | 224 |    |
| 17 | 15.767 | 209 |   |
| 18 | 1.334  | 171 |  |
| 19 | 20.181 | 149 |  |
| 20 | 2.042  | 121 |  |

| Original MS spectra of TC degradation intermediates. |                                                                                      |
|------------------------------------------------------|--------------------------------------------------------------------------------------|
| TC                                                   | 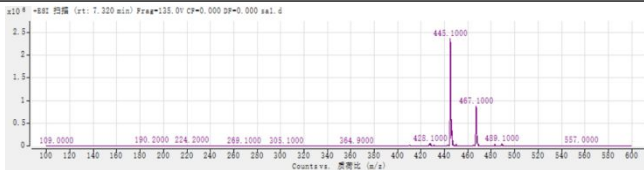 |



|   |  |
|---|--|
| 1 |  |
| 2 |  |
| 3 |  |
| 4 |  |
| 5 |  |
| 6 |  |
| 7 |  |
| 8 |  |

|       |  |
|-------|--|
| 9     |  |
| 10,11 |  |
| 12    |  |
| 13    |  |
| 14    |  |
| 15    |  |
| 16    |  |
| 17    |  |
| 18    |  |

|    |                                                                                    |
|----|------------------------------------------------------------------------------------|
| 19 |  |
| 20 |  |
